**Word counts**

Text: 2,831

Abstract: 275

**Title:** Racial/ethnic-based spirometry reference equations: Are they accurate for admixed populations?

**Running head:** Racial/Ethnic-Based Spirometry: Accuracy for Admixed

**Author list:** Jonathan Witonsky, MD; Jennifer R. Elhawary, MS; Celeste Eng, BS; José R.

Rodríguez-Santana, MD; Luisa N. Borrell<sup>#</sup>, DDS, PhD; and Esteban G. Burchard<sup>#</sup>, MD, MPH

<sup>#</sup>*Shared senior authors.*

**Affiliations:** From the Department of Pediatrics (Dr Witonsky), Department of Medicine (Ms Elhawary and Ms Eng), and Department of Medicine and Department of Bioengineering and Therapeutic Sciences (Dr Burchard), University of California, San Francisco, San Francisco, CA; Centro de Neumología Pediátrica (Dr Rodríguez-Santana), San Juan, PR; and the Department of Epidemiology and Biostatistics, Graduate School of Public Health and Health Policy (Dr Borrell), City University of New York, New York, NY.

**Correspondence to:** Jonathan Witonsky, MD, Department of Pediatrics, University of California, San Francisco, 550 16th Street, 4th Floor, San Francisco, CA, 94143; e-mail: [jonathan.witonsky@ucsf.edu](mailto:jonathan.witonsky@ucsf.edu)

**Funding information:** This work was supported in part by the Sandler Family Foundation; the American Asthma Foundation; the RWJF Amos Medical Faculty Development Program; Harry Wm. and Diana V. Hind Distinguished Professor in Pharmaceutical Sciences II; the National Institutes of Health, National Heart, Lung, and Blood Institute [R01HL117004, 1X01HL134589,

## RACIAL/ETHNIC-BASED SPIROMETRY: ACCURACY FOR ADMIXED

24 R01HL128439, R01HL135156, R01HL141992]; the National Institute of Environmental Health  
 25 Sciences [R01ES015794, R21ES24844]; the National Institute on Minority Health and Health  
 26 Disparities [R01MD010443, R56MD013312]; the National Human Genome Research Institute  
 27 [U01HG009080]; the National Institute of General Medical Sciences [T32GM007546], and the  
 28 UCSF Pediatric Allergy, Immunology, and Bone Marrow Transplantation Division. The content  
 29 of this publication is solely the responsibility of the authors and does not necessarily reflect the  
 30 views or policies of the Department of Health and Human Services, nor does mention of trade  
 31 names, commercial products, or organizations imply endorsement by the U.S. government.

# RACIAL/ETHNIC-BASED SPIROMETRY: ACCURACY FOR ADMIXED

## ABSTRACT

**BACKGROUND:** Variation in genetic ancestry among admixed racial/ethnic groups may influence the fit of guideline-recommended spirometry reference equations, which rely on self-identified race/ethnicity.

**RESEARCH QUESTION:** What is the influence of genetic ancestry on the fit of the guideline-recommended racial/ethnic-based spirometry reference equations in populations of genetically admixed children?

**STUDY DESIGN AND METHODS:** Cross-sectional fit of guideline-recommended racial/ethnic-based spirometry reference equations was evaluated in control subjects from case-control studies of asthma. Anthropometry, blood samples, and spirometric measurements were obtained in 599 healthy admixed children, aged 8 to 21-years. Genetic ancestry was estimated using genome-wide genotype data. Equation fit was determined as a mean z-score between -0.5 and 0.5 and assessed in self-identified African American (N = 275) and Puerto Rican (N = 324) children using the distribution to determine cut points of genetic ancestry.

**RESULTS:** For African American children, African American-derived equations fit for predicting FEV<sub>1</sub> and FVC in those with an African ancestry above the median (81-100%), whereas composite equations for “other/mixed” populations fit for predicting FEV<sub>1</sub> and FVC in those with an African ancestry below the median (31-81%). Among Puerto Rican children, White-derived equations fit for predicting FEV<sub>1</sub>, and the composite equations fit for predicting FVC for those with African ancestry above the median (21-88%). In contrast, in Puerto Rican children with African ancestry below the median (6-21%), only equations derived in Whites provide an adequate fit.

## RACIAL/ETHNIC-BASED SPIROMETRY: ACCURACY FOR ADMIXED

- 54    **INTERPRETATION:** Guideline-recommended spirometry reference equations yielded biased
- 55    estimates of lung function in admixed populations with high variation of African ancestry.
- 56    Spirometry is due for reference equations that incorporate genetic ancestry, either for more
- 57    precise application of the current equations or the derivation and utilization of new equations.

## RACIAL/ETHNIC-BASED SPIROMETRY: ACCURACY FOR ADMIXED

### 58 INTRODUCTION

59 There has been great debate over the use of racial/ethnic classification in medicine and  
60 biomedical research.<sup>1-3</sup> Presently, pulmonary function testing is one of the few clinical  
61 applications where self-reported race/ethnicity is used to define a “normal” range. Normative  
62 equations of lung function have been developed by testing large populations categorized by self-  
63 reported race/ethnicity.<sup>4,5</sup> However, many populations have ancestral contributions from multiple  
64 continents (i.e., genetically admixed) and, as a result, self-identified racial and ethnic categories  
65 may not fully capture an individual’s genetic ancestry.<sup>6-9</sup> Therefore, using self-reported  
66 race/ethnicity may result in misclassifying individuals with respect to the normal range for  
67 physiologic lung measures if the latter are more dependent on ancestry.<sup>10</sup> This error could lead to  
68 inaccuracies in evaluating individual pulmonary function.

69 The two most widely employed sets of spirometry reference equations used in pulmonary  
70 function testing, and those recommended by American Thoracic Society and European  
71 Respiratory Society (ATS/ERS) guidelines, are the third National Health and Nutrition  
72 Examination Survey (NHANES III) equations, derived in White, African American, and  
73 Mexican American adults and children aged 8-80 years, and the Global Lung Function Initiative  
74 (GLI) equations, derived in White, African American, and North and South East Asian adults  
75 and children aged 3-95 years.<sup>4,5,11</sup> GLI also offers a composite equation—an average of the four  
76 population-specific GLI equations—for use in multiracial or unrepresented populations. These  
77 guideline-recommended spirometry reference equations adjust for clinically important  
78 differences in normal lung function observed between racial/ethnic groups. Selecting an  
79 inappropriate reference equation—or ignoring race/ethnicity by using a one-size-fits-all  
80 approach—can cause unintended clinical consequences, including errors and delays in disease

## RACIAL/ETHNIC-BASED SPIROMETRY: ACCURACY FOR ADMIXED

detection and medical management, misclassification of disease severity, denial of disability claims, and ineligibility for life-saving treatments such as transplants and other surgeries.<sup>12–20</sup>

Several studies have demonstrated that the guideline-recommended lung function equations are well-fitted to populations similar to those in which they were derived.<sup>16,21–25</sup> However, to date, none of these studies have evaluated equation fit after considering intra-population variation in genetic ancestry, which we have demonstrated is associated with lung function in African Americans and Latinos.<sup>26–28</sup> Herein, we evaluate the guideline-recommended White, African American, Mexican American, and composite reference equations for two independent genetically admixed populations of African American and Puerto Rican children. Specifically, we assessed guideline-recommended lung function equation fit in each population and investigated their fit after classifying these populations using their genetic ancestry distribution.

## METHODS

### Study Populations

Spirometric predictions and genetic ancestry proportions were calculated using clinical and genetic data from healthy control subjects among two case-control studies of asthma conducted between 2006 and 2014: the Genes-environments & Admixture in Latino Americans (GALA II) study and the Study of African Americans, Asthma, Genes, & Environments (SAGE).<sup>29</sup> Subjects were aged 8 to 21-years old at the time of recruitment and were healthy with no reported history of lung disease, asthma or allergies, use of medication for allergies, or any symptoms of wheezing or shortness of breath during their lifetime. Parents and grandparents of study subjects self-identified as Puerto Rican in GALA II or African American in SAGE. GALA II subjects were recruited from five urban study centers throughout the U.S. (Chicago, Bronx, Houston, San

## RACIAL/ETHNIC-BASED SPIROMETRY: ACCURACY FOR ADMIXED

103 Francisco Bay Area, and Puerto Rico) and SAGE subjects were recruited from the San Francisco  
104 Bay Area.

105 All participants provided written consent to being in the study. Consent was obtained from all  
106 participants 18-years and older and parent/legal guardians of minor participants. The study  
107 protocols for both GALA II and SAGE were approved by the University of California, San  
108 Francisco (UCSF) Human Research Protection Program Institutional Review Board (IRB) and  
109 all institutions participating in recruitment obtained the appropriate approvals from their IRBs for  
110 recruitment related activity.

111 In total, 3,226 children without asthma were enrolled in the two studies (2,538 in GALA II and  
112 688 in SAGE) with complete spirometry and genome-wide genetic data available for 1,049  
113 children. After exclusion criteria (Figure 1) were applied, 599 children remained: 275 African  
114 American children and 324 Puerto Rican children.

### 115 **Assessments**

116 Spirometric measurements were collected on all subjects with testing performed in accordance  
117 with ATS recommendations.<sup>30</sup> Samples were genotyped with the Affymetrix Axiom® LAT1  
118 array (World Array 4, Affymetrix, Santa Clara, CA), which includes 817,810 single nucleotide  
119 polymorphisms (SNPs). This array was designed to capture genetic variation in African-descent  
120 populations such as African Americans and Latinos.<sup>31</sup> The genetic ancestry of each study  
121 participant was determined using an unsupervised analysis in the ADMIXTURE software  
122 package, as described elsewhere.<sup>28</sup>

## RACIAL/ETHNIC-BASED SPIROMETRY: ACCURACY FOR ADMIXED

We examined the distribution of genetic ancestry in each population and used the median for African ancestry to classify African American and Puerto Rican populations into two groups, “*greater than median*” and “*less than or equal to median*,” based on African ancestry. Median African ancestry cut points were 81.3% (range: 30.7-100%) for African American children and 21.3% (range: 6.4-87.5%) for Puerto Rican children. Reference equation fit was independently assessed in the African American population (N = 275), the African American population with African ancestry greater than the population’s median (N = 137), the African American population with African ancestry less than or equal to the population median (N = 138), the Puerto Rican population (N = 324), the Puerto Rican population with African ancestry greater than the population’s median (N = 162), and the Puerto Rican population with African ancestry less than or equal to the population median (N = 162).

### **Statistical Analyses**

Demographic characteristics were compared within each subpopulation using the Student's t-test for normally distributed continuous variables, the Wilcoxon Rank Sum Test for non-normally distributed continuous variables, and chi-squared statistic for dichotomous variables.

Consistent with previous studies,<sup>32,33</sup> cross-sectional fit of the equations was determined by calculating FEV<sub>1</sub> and FVC z-scores. The z-score means for FEV<sub>1</sub> and FVC were calculated using the NHANES III White, African American, and Mexican American equations and the GLI White, African American, and composite equations. Because all study participants were healthy with assumed normal lung function, an equation was deemed “best fit” when the mean z-score was closest to zero (perfect fit being a mean z-score of zero), and an equation was deemed to have “sufficient fit” if the mean z-score was between -0.5 and 0.5 using two one-sided t-tests



## RACIAL/ETHNIC-BASED SPIROMETRY: ACCURACY FOR ADMIXED

(TOST) for equivalence.<sup>21,34,35</sup> Assessment of significance testing for TOST was performed using 95% confidence intervals and *P*-values.<sup>36</sup> An equation was deemed appropriate if it provided sufficient fit for both FEV<sub>1</sub> and FVC. A sensitivity analysis was performed assessing fit using genetic ancestry tertile, quartile, and quintile distributions. To assess for misclassification, the proportion of subjects with observed spirometry data below the lower limit of normal (LLN), which corresponds to the 5<sup>th</sup> percentile (z-score = -1.65) of predicted values, were also evaluated for FEV<sub>1</sub> and FVC. Data analyses were conducted using R.<sup>33</sup>

## RESULTS

Table 1 summarizes general characteristics of participants in each racial/ethnic group. Sex, age, height, and weight distributions were comparable across each subpopulation. Lung function, as measured by mean z-scores for FEV<sub>1</sub> and FVC, was higher for African American (zFEV<sub>1</sub>: 0.41, zFVC: 0.56) and Puerto Rican (zFEV<sub>1</sub>: 0.69, zFVC: 0.55) subpopulations with African ancestry less than or equal to the median than African American (zFEV<sub>1</sub>: 0.29, zFVC: 0.43) and Puerto Rican (zFEV<sub>1</sub>: 0.43, zFVC: 0.23) subpopulations with African ancestry greater than the median. These differences in lung function between subpopulations were statistically significant for the Puerto Rican children but not for the African American children.

### Genetic Ancestry Proportions

When comparing subpopulations according to the median distribution, the means ( $\pm$  standard deviation, or SD) of African ancestry were 73.2% ( $\pm$  9.6%) and 85.9% ( $\pm$  3.2%) for African American children below and above the median, respectively (Table 1). These values were 15.1% ( $\pm$  3.3%) and 30.2% ( $\pm$  9.8%) among Puerto Rican children. Figure 2 shows the

## RACIAL/ETHNIC-BASED SPIROMETRY: ACCURACY FOR ADMIXED

European, African, and Native American genetic admixture in the African American and Puerto Rican populations.

### **Fit to African American Children**

Table 2a provides equation fit to spirometric measurements in the study population and subpopulations of African American children based on genetic ancestry distribution. The NHANES III equations derived in African Americans and the GLI composite equations were appropriate for African American children at the population level, providing sufficient fit for predicting FEV<sub>1</sub> and FVC. The mean z-scores were 0.17 (95% CI: 0.06 to 0.28) for predicting FEV<sub>1</sub> (2.5% below the LLN) and 0.34 (95% CI: 0.23 to 0.45) for predicting FVC (1.8% below the LLN) using the NHANES III African American equations, whereas they were -0.32 (95% CI: -0.43 to -0.20) for predicting FEV<sub>1</sub> (5.8% below the LLN) and -0.14 (95% CI: -0.27 to -0.02) for predicting FVC (6.2% below the LLN) using GLI composite equations. When using the African genetic ancestry median to classify African American children, only the GLI composite equations were appropriate for predicting both FEV<sub>1</sub> and FVC with mean z-scores of -0.25 (95% CI: -0.42 to -0.09) for FEV<sub>1</sub> (5.8% below the LLN) and -0.08 (95% CI: -0.25 to 0.10) for FVC (5.8% below the LLN) for African American children classified below the median. In contrast, for African American children with African ancestry above the median, the NHANES III equations derived in African American children were appropriate for predicting FEV<sub>1</sub> (0.11; 95% CI: -0.04 to 0.26; 2.9% below the LLN) and FVC (0.27; 95% CI: 0.10 to 0.43; 2.9% below the LLN). Figure 3a provides the fit for the NHANES III and GLI equations using other distribution cut points of African ancestry in addition to the median. The figure underscores the poor fit of the equations in African American children when using other African ancestry cut points.

## RACIAL/ETHNIC-BASED SPIROMETRY: ACCURACY FOR ADMIXED

### **Fit to Puerto Rican Children**

At the population level, the GLI equations derived in Whites were appropriate for Puerto Rican children with mean z-scores of -0.06 (95% CI: -0.19 to 0.06) for predicting FEV<sub>1</sub> (6.8% below the LLN) and -0.33 (95% CI: -0.46 to -0.21) for predicting FVC (11.1% below the LLN) (Table 2b). For Puerto Rican children with African ancestry below and above the median, the GLI and NHANES III equations derived in Whites fit for predicting FEV<sub>1</sub>. The White-derived equations only fit for predicting FVC among Puerto Rican children with African ancestry below the median. The GLI composite equation fit for predicting FVC in the subpopulation of Puerto Rican children with African ancestry above the median. However, the GLI composite equations underestimated FEV<sub>1</sub> predictions among those with African ancestry below the median (Figure 3b). In Puerto Rican children with African ancestry below the median, both GLI and NHANES III equations derived in Whites were appropriate for predicting FEV<sub>1</sub> and FVC.

### **DISCUSSION**

Pulmonary function testing is one of the few applications in clinical medicine where self-identified race/ethnicity is used to predict normative values. Our findings confirm previous observations that race/ethnicity-based equations can misestimate lung function after considering intra-population variation in African ancestry.<sup>26</sup> The influence of genetic ancestry on guideline-recommended equation fit is relevant to African American and Puerto Rican populations in which there are especially wide distributions in the proportions of African ancestry.<sup>37</sup> Consequently, the guideline-recommended equations may exacerbate inequities in respiratory health, which disproportionately affect the very populations for whom the race/ethnicity-based spirometry equations are the least precise.<sup>38</sup> As a result, these populations are most prone to

## RACIAL/ETHNIC-BASED SPIROMETRY: ACCURACY FOR ADMIXED

underestimated lung function predictions. Misestimated lung function may result in delays of disease detection or overestimated lung function predictions, which can result in unnecessary treatment. This is of critical concern given that African American and Latino/Hispanic children collectively make up approximately 40% of all children in the United States.<sup>39</sup>

Previous studies have validated the use of the GLI equations derived in African American populations for use in African and African American children.<sup>22,40</sup> Our findings for African American children in this study were consistent with those studies, although only for the total population and ignoring African ancestry variation. After considering the variation in African ancestry, the guideline-recommended equations derived in African American populations were no longer well-fitted for predicting lung function in African American children with African ancestry below the population's median. Only the GLI composite equation—an equation derived as the average of all GLI data for use in multiracial or unrepresented populations—was appropriately fitted for this subpopulation. This finding suggests that inappropriate spirometry reference equations might be used for as many as half of all African American children, and further illustrates how intra-population variation in African ancestry limits the clinical utility of a single reference equation for an entire genetically admixed group.

In this study, the GLI equations derived in Whites were appropriate for the study population of Puerto Rican children. This was an unexpected finding given that the largest study of reference equation fit for Latino/Hispanic adults found the GLI White equations overestimated lung function among adults who self-identified as Puerto Rican.<sup>18</sup> The finding was also contrary to the assumption that the GLI composite equation would be most appropriate for Puerto Ricans, a population not represented by the four groups in which the GLI equations were derived. Corroborating prior studies showing that African ancestry is inversely associated with lung

## RACIAL/ETHNIC-BASED SPIROMETRY: ACCURACY FOR ADMIXED

function in Puerto Rican individuals,<sup>27,28</sup> the GLI White equations were not appropriate for Puerto Rican children with African ancestry above the population's median. In this subpopulation, no equation was appropriately fitted for predicting both FEV<sub>1</sub> and FVC, suggesting that as many as half of all Puerto Rican children are being misclassified for these measures. The lack of an appropriate equation for Puerto Rican children with more African ancestry is especially problematic considering that asthma prevalence and mortality are highest among Puerto Ricans compared to other racial/ethnic groups.<sup>41,42</sup> Puerto Ricans have wide-ranging proportions of genetic ancestry and self-identify across the spectrum of the U.S. Census racial categories, making the population ideally suited to the ongoing study of race/ethnicity and genetic ancestry as predictors of lung function.<sup>37,43,44</sup>

There are some important limitations of this study. First, after classifying the populations by genetic ancestry distribution, the sample sizes were below what is recommended for spirometry equation validation studies.<sup>45</sup> Consequently, equations deemed a poor fit for a subpopulation resulted because this study was underpowered to detect significance when using specified TOST criterion. However, to address this limitation, a sensitivity analysis demonstrated how mean z-scores tended to trend in the serially stratified subpopulations, revealing the continuous influence of ancestry on equation fit. Second, the study did not include the ratio of FEV<sub>1</sub> to FVC (FEV<sub>1</sub>/FVC), which is the most commonly used outcome to assess airway obstruction. The FEV<sub>1</sub>/FVC ratio was excluded because prior reports suggest that racial/ethnic reductions in FEV<sub>1</sub> and FVC are proportional and, therefore, the ratio is independent of race/ethnicity.<sup>5,22,46,47</sup> Third, our findings are not generalizable to adults because the analysis was performed exclusively in children aged 18-21. Lastly, our results were not replicated in other populations of African

## RACIAL/ETHNIC-BASED SPIROMETRY: ACCURACY FOR ADMIXED

American and Puerto Rican children, an essential next step in the evaluation of the guideline-recommended equations.

Despite these limitations, this is the first study assessing the influence of genetic ancestry on the applicability of guideline-recommended race/ethnicity-based spirometry reference equations for admixed populations. This study shows that the use of guideline-recommended spirometry reference equations in admixed populations is limited by intra-population variation in genetic ancestry. In addition, this study contributes to the ongoing debate regarding the use of race/ethnicity in clinical algorithms by demonstrating that race/ethnicity, alone, is insufficient for estimating lung function in a large proportion of minority children.<sup>19</sup> We demonstrate that the use of genetic ancestry data instead of race/ethnicity in lung function equations could improve lung function prediction equations for admixed populations. That said, we recognize that incorporating race/ethnicity captures essential epidemiologic information that relates to lung function and overall clinical outcomes not captured by genetic ancestry.<sup>19</sup>

## INTERPRETATION

This study demonstrates that guideline-recommended spirometry reference equations, which rely on self-identified race/ethnicity, inconsistently fit homogenous racial/ethnic groups after classifying these populations by their genetic ancestry distribution. Recent scientific advances allow for estimates of genetic ancestry to be easily and inexpensively measured as exemplified by direct-to-consumer genetic ancestry testing. Unfortunately, current clinical practice has been slow to adopt and incorporate modern advances from the Human Genome Project, which was started over thirty years ago. Accordingly, spirometry is due for reference equations that incorporate genetic ancestry, either for more precise application of the current equations or the

## RACIAL/ETHNIC-BASED SPIROMETRY: ACCURACY FOR ADMIXED

derivation and utilization of new equations. Meanwhile, the increasing availability of genetic data in the clinical setting can be leveraged to guide selection of the most appropriate spirometry reference equation. Our findings suggest that African American children with African ancestry above 80% are best fit by equations derived in African American populations, whereas those with African ancestry below 80% are best fit by the GLI composite equation. Puerto Rican children with African ancestry below 20% are best fit by equations derived in White populations. However, there is no appropriately fitted equation for Puerto Rican children with African ancestry above 20%. As a result, extra caution must be taken when choosing a spirometry reference equation and interpreting its results among racially/ethnically diverse populations. Racially/ethnically diverse individuals might be best served if their spirometric measurements are evaluated using multiple equations, with each result taken in the context of clinical symptoms.

### **Acknowledgments**

**Author contributions:** J. W. contributed to the conception and design of the work, analysis and interpretation of the data, and drafting and revision of the manuscript. C. E. contributed to the acquisition of data. J. R. E., J. R. R.-S., L. N. B., and E. G. B.: contributed to the analysis and interpretation of the data, drafting and revision of the manuscript, and critical review of the manuscript.

**Other contributions:** The authors thank the participants and their families for their contribution, as well as the health care professionals and clinics for their support and participation in the Genes-environments & Admixture in Latino Americans Study and the Study of African

# RACIAL/ETHNIC-BASED SPIROMETRY: ACCURACY FOR ADMIXED

300 Americans, Asthma, Genes & Environments. In particular, the authors thank the study  
301 coordinator Sandra Salazar and the recruiters who obtained the data: Kelley Meade, MD, Adam  
302 Davis, MPH, MA, Lisa Caine, Emerita Brigino-Buenaventura, MD, Duanny Alva, MD, Gaby  
303 Ayala-Rodriguez, Ulysses Burley, Elizabeth Castellanos, Jaime Colon, Denise DeJesus, Iliana  
304 Flexas, Blanca Lopez, Brenda Lopez, MD, Louis Martos, Vivian Medina, Juana Olivo, Mario  
305 Peralta, Esther Pomares, MD, Jihan Quraishi, Johanna Rodriguez, Shahdad Saeedi, Dean Soto,  
306 Ana Taveras, and Emmanuel Viera. The authors would also like to thank Andrew Zeiger, Oona  
307 Risse-Adams, María G. Contreras, Fernando Picazo, MD, Martin Rofael, MD, Angel C. Y. Mak,  
308 PhD, Donglei Hu, PhD, Scott Huntsman, MS, Eric Wohlford, MD, PhD, Sam S. Oh, PhD, MPH,  
309 Maria Pino-Yanes, PhD, L. Keoki Williams, MD, MPH, Michael A. Lenoir, MD, Noah A.  
310 Zaitlen, PhD, Elad Ziv, MD, Thomas Nuckton, MD, Christopher Gignoux, PhD, and Joshua  
311 Galanter, MD for their advice on project conception and analysis.



# RACIAL/ETHNIC-BASED SPIROMETRY: ACCURACY FOR ADMIXED

## References

1. Burchard EG, Ziv E, Coyle N, et al. The importance of race and ethnic background in biomedical research and clinical practice. *N Engl J Med* 2003;348(12):1170–1175.
2. Phimister EG. Medicine and the racial divide. *N Engl J Med* 2003;348(12):1081–1082.
3. Cooper RS, Kaufman JS, Ward R. Race and genomics. *N Engl J Med* 2003;348(12):1166–1170.
4. Hankinson JL, Odencrantz JR, Fedan KB. Spirometric Reference Values from a Sample of the General U.S. Population. *Am J Respir Crit Care Med* 1999;159(1):179–187.
5. Quanjer PH, Stanojevic S, Stocks J, Cole TJ. GLI-2012 All-Age Multi-Ethnic Reference Values for Spirometry. :15.
6. The use of racial, ethnic, and ancestral categories in human genetics research. *Am J Hum Genet* 2005;77(4):519–532.
7. Goldstein DB, Hirschhorn JN. In genetic control of disease, does “race” matter? *Nat Genet* 2004;36(12):1243–1244.
8. Yaeger R, Avila-Bront A, Abdul K, et al. Comparing genetic ancestry and self-described race in african americans born in the United States and in Africa. *Cancer Epidemiol Biomarkers Prev* 2008;17(6):1329–1338.
9. Yang JJ, Burchard EG, Choudhry S, et al. Differences in allergic sensitization by self-reported race and genetic ancestry. *J Allergy Clin Immunol* 2008;122(4):820-827.e9.
10. Kumar et al. - 2010 - Genetic Ancestry in Lung-Function Predictions.pdf.
11. Graham BL, Steenbruggen I, Miller MR, et al. Standardization of Spirometry 2019 Update. An Official American Thoracic Society and European Respiratory Society Technical Statement. *Am J Respir Crit Care Med* 2019;200(8):e70–e88.
12. Quanjer PH, Stanojevic S, Enright PL, et al. MULTI-ETHNIC REFERENCE VALUES FOR SPIROMETRY FOR THE 3-95 YEAR. 2012;39:11.
13. Myers JE. Differential ethnic standards for lung functions, or one standard for all? *S Afr Med J* 1984;65(19):768–772.
14. Chien JW, Sullivan KM. Carbon monoxide diffusion capacity: how low can you go for hematopoietic cell transplantation eligibility? *Biol Blood Marrow Transplant* 2009;15(4):447–453.
15. Fulambarker A, Copur AS, Javeri A, Jere S, Cohen ME. Reference Values for Pulmonary Function in Asian Indians Living in the United States. *Chest* 2004;126(4):1225–1233.

# RACIAL/ETHNIC-BASED SPIROMETRY: ACCURACY FOR ADMIXED

16. Hankinson JL, Kawut SM, Shahar E, Smith LJ, Stukovsky KH, Barr RG. Performance of American Thoracic Society-Recommended Spirometry Reference Values in a Multiethnic Sample of Adults. *Chest* 2010;137(1):138–145.
17. Korotzer B, Ong S, Hansen JE. Ethnic Differences in Pulmonary Function in Healthy Nonsmoking Asian-Americans and European-Americans. *Am J Respir Crit Care Med* 2000;161(4):1101–1108.
18. LaVange L, Davis SM, Hankinson J, et al. Spirometry Reference Equations from the HCHS/SOL (Hispanic Community Health Study/Study of Latinos). *Am J Respir Crit Care Med* 2017;196(8):993–1003.
19. Borrell LN, Elhawary JR, Fuentes-Afflick E, et al. Race and Genetic Ancestry in Medicine - A Time for Reckoning with Racism. *N Engl J Med* 2021;
20. Quanjer PH, Pretto JJ, Brazzale DJ, Boros PW. Grading the severity of airways obstruction: new wine in new bottles. *Eur Respir J* 2014;43(2):505–512.
21. Hall GL, Thompson BR, Stanojevic S, et al. The Global Lung Initiative 2012 reference values reflect contemporary Australasian spirometry: Global Lung Initiative reference values. *Respirology* 2012;17(7):1150–1151.
22. Bonner R, Lum S, Stocks J, Kirkby J, Wade A, Sonnappa S. Applicability of the Global Lung Function Spirometry Equations in Contemporary Multiethnic Children. :2.
23. Brazzale DJ, Hall GL, Pretto JJ. Effects of adopting the new global lung function initiative 2012 reference equations on the interpretation of spirometry. *Respiration* 2013;86(3):183–189.
24. Hulo S, Broucker V de, Giovannelli J, et al. Global Lung Function Initiative reference equations better describe a middle-aged, healthy French population than the European Community for Steel and Coal values. *Eur Respir J* 2016;48(6):1779–1781.
25. Belo J. Reference values for spirometry in elderly individuals: a cross-sectional study of different reference equations. 2018;9.
26. Kumar R, Seibold MA, Aldrich MC, et al. Genetic Ancestry in Lung-Function Predictions. *N Engl J Med* 2010;363(4):321–330.
27. Brehm JM, Acosta-Pérez E, Klei L, et al. African ancestry and lung function in Puerto Rican children. *Journal of Allergy and Clinical Immunology* 2012;129(6):1484-1490.e6.
28. Pino-Yanes M, Thakur N, Gignoux CR, et al. Genetic ancestry influences asthma susceptibility and lung function among Latinos. *Journal of Allergy and Clinical Immunology* 2015;135(1):228–235.

# RACIAL/ETHNIC-BASED SPIROMETRY: ACCURACY FOR ADMIXED

29. Nishimura KK, Galanter JM, Roth LA, et al. Early-Life Air Pollution and Asthma Risk in Minority Children. The GALA II and SAGE II Studies. *Am J Respir Crit Care Med* 2013;188(3):309–318.
30. Miller MR. Standardisation of spirometry. *European Respiratory Journal* 2005;26(2):319–338.
31. Hoffmann TJ, Zhan Y, Kvale MN, et al. Design and coverage of high throughput genotyping arrays optimized for individuals of East Asian, African American, and Latino race/ethnicity using imputation and a novel hybrid SNP selection algorithm. *Genomics* 2011;98(6):422–430.
32. Theodore Lytras. rspiro: Implementation of Spirometry Equations [Internet]. 2020. Available from: <https://github.com/thlytras/rspiro>
33. R Core Team. R: A Language and Environment for Statistical Computing [Internet]. Vienna, Austria: R Foundation for Statistical Computing; 2020. Available from: <https://www.R-project.org/>
34. Thompson BR, Stanojevic S, Abramson MJ, et al. The all-age spirometry reference ranges reflect contemporary Australasian spirometry. *Respirology* 2011;16(6):912–917.
35. Ben Saad H, El Attar MN, Hadj Mabrouk K, et al. The recent multi-ethnic global lung initiative 2012 (GLI2012) reference values don't reflect contemporary adult's North African spirometry. *Respir Med* 2013;107(12):2000–2008.
36. Lakens D. Equivalence Tests: A Practical Primer for t Tests, Correlations, and Meta-Analyses. *Soc Psychol Personal Sci* 2017;8(4):355–362.
37. Bryc K, Durand EY, Macpherson JM, Reich D, Mountain JL. The genetic ancestry of African Americans, Latinos, and European Americans across the United States. *Am J Hum Genet* 2015;96(1):37–53.
38. Celedón JC, Roman J, Schraufnagel DE, Thomas A, Samet J. Respiratory health equality in the United States. The American thoracic society perspective. *Ann Am Thorac Soc* 2014;11(4):473–479.
39. The Annie E. Casey Foundation. Child population by race in the United States [Internet]. Kids Count Data Center. Available from: <https://datacenter.kidscount.org/data/tables/103-child-population-by-race#detailed/1/any/false/1729,37,871,870,573,869,36,868,867,133/68,69,67,12,70,66,71,72/423,424>
40. Arigliani M, Canciani MC, Mottini G, et al. Evaluation of the Global Lung Initiative 2012 Reference Values for Spirometry in African Children. *Am J Respir Crit Care Med* 2017;195(2):229–236.

# RACIAL/ETHNIC-BASED SPIROMETRY: ACCURACY FOR ADMIXED

41. Centers for Disease Control and Prevention (CDC). Table 2-1 Lifetime Asthma Prevalence Percents by Age, United States: National Health Interview Survey, 2018 [Internet]. 2019 [cited 2021 Feb 4];Available from: <https://www.cdc.gov/asthma/nhis/2018/table2-1.htm>
42. Health, United States, 2010: With Special Feature on Death and Dying. Hyattsville (MD): National Center for Health Statistics (US); 2011.
43. United States Census Bureau. Hispanic or Latino Origin by Race. Table ID: 803002 [Internet]. 2020;Available from: <https://data.census.gov/cedsci/table?q=HISPANIC%20OR%20LATINO%20ORIGIN%20BY%20RACE&t=Hispanic%20or%20Latino&tid=ACSDT1Y2019.B03002&hidePreview=false>
44. United States Census Bureau. Quick Facts: Puerto Rico [Internet]. 2020;Available from: <https://www.census.gov/quickfacts/PR>
45. Quanjer PH, Stocks J, Cole TJ, Hall GL, Stanojevic S. Influence of secular trends and sample size on reference equations for lung function tests. *Eur Respir J* 2011;37(3):658–664.
46. Stocks J, Sonnappa S, Lum S. Lung function testing in children: importance of race and ethnic-specific reference equations. *Expert Review of Respiratory Medicine* 2014;8(5):527–531.
47. Kirkby J, Bonner R, Lum S, et al. Interpretation of pediatric lung function: impact of ethnicity. *Pediatr Pulmonol* 2013;48(1):20–26.

# RACIAL/ETHNIC-BASED SPIROMETRY: ACCURACY FOR ADMIXED

**Table 1.** Distribution of selected characteristics for participants in GALA II and SAGE based on race/ethnicity and genetic ancestry categories: 2006-2014.

|                   | African American Children           |                      |                      | Puerto Rican Children               |                      |                      |
|-------------------|-------------------------------------|----------------------|----------------------|-------------------------------------|----------------------|----------------------|
|                   | African Ancestry<br>(Median: 81.3%) |                      |                      | African Ancestry<br>(Median: 21.3%) |                      |                      |
|                   | All<br>(N = 275)                    | ≤Median<br>(N = 138) | >Median<br>(N = 137) | All<br>(N = 324)                    | ≤Median<br>(N = 162) | >Median<br>(N = 162) |
| Boys, %           | 41                                  | 43                   | 39                   | 45                                  | 43                   | 48                   |
| Age, year         | 16.2 (3.8)                          | 15.9 (3.9)           | 16.5 (3.7)           | 14.0 (3.0)                          | 14.2 (3.2)           | 13.8 (2.7)           |
| Height, cm        | 162.3<br>(13.6)                     | 161.4<br>(13.6)      | 163.1<br>(13.6)      | 158.6<br>(11.6)                     | 157.9<br>(12.7)      | 159.4<br>(10.3)      |
| Weight, kg        | 67.3 (24.4)                         | 66.1 (22.7)          | 68.4 (26.1)          | 57.8 (18.8)                         | 56.6 (16.9)          | 59.0 (20.5)          |
| Ancestry,<br>%    |                                     |                      |                      |                                     |                      |                      |
| African           | 79.5 (9.6)                          | 73.2 (9.6)           | 85.9 (3.2)*          | 22.7 (10.5)                         | 15.1 (3.3)           | 30.2 (9.8)*          |
| Native            | —                                   | —                    | —                    | 10.2 (3.1)                          | 10.6 (3.5)           | 9.8 (2.7)*           |
| zFEV <sub>1</sub> | 0.35 (0.95)                         | 0.41 (0.97)          | 0.29 (0.94)          | 0.56 (1.21)                         | 0.69 (1.14)          | 0.43 (1.28)*         |
| zFVC              | 0.49 (0.99)                         | 0.56 (0.97)          | 0.43 (1.01)          | 0.39 (1.27)                         | 0.55 (1.15)          | 0.23 (1.36)*         |

*Definition of abbreviations:* zFEV<sub>1</sub> = z-score for FEV<sub>1</sub>; zFVC = z-score for FVC.

Results are presented as mean (SD) unless otherwise specified. Spirometry z-scores based on Global Lung Function Initiative 2012 equations, using the African American-derived equation for African American children and the composite equation for Puerto Rican children.<sup>5</sup>

\*Differences between subpopulations:  $P < 0.05$  (Student's t-test and Wilcoxon Rank Sum Test).

# RACIAL/ETHNIC-BASED SPIROMETRY: ACCURACY FOR ADMIXED

**Table 2a.** Fit of Spirometry Equation Predictions to Spirometric Measurements in African American Children: 2006-2014

|                              | All<br>(N = 275)                             | African Ancestry<br>≤ Median<br>30.7 to 81.3%<br>(N = 138) | > Median<br>81.4 to 100%<br>(N = 137)       |
|------------------------------|----------------------------------------------|------------------------------------------------------------|---------------------------------------------|
| <b>zFEV<sub>1</sub></b>      |                                              |                                                            |                                             |
| NHANES III, White            | -0.95 (-1.07, -0.84)<br>[24.0%]              | -0.88 (-1.04, -0.73)<br>[23.9%]                            | -1.03 (-1.19, -0.86)<br>[24.1%]             |
| NHANES III, African American | 0.17 (0.06, 0.28) <sup>*†</sup><br>[2.5%]    | 0.24 (0.08, 0.39) <sup>*</sup><br>[2.2%]                   | 0.11 (-0.04, 0.26) <sup>*†</sup><br>[2.9%]  |
| NHANES III, Mexican American | -1.19 (-1.30, -1.07)<br>[31.6%]              | -1.12 (-1.27, -0.96)<br>[28.3%]                            | -1.26 (-1.42, -1.09)<br>[35.0%]             |
| GLI, White                   | -0.88 (-0.99, -0.77)<br>[18.2%]              | -0.82 (-0.97, -0.67)<br>[18.8%]                            | -0.94 (-1.09, -0.79)<br>[17.5%]             |
| GLI, African American        | 0.35 (0.24, 0.46) <sup>*</sup><br>[1.8%]     | 0.41 (0.25, 0.58)<br>[1.4%]                                | 0.29 (0.13, 0.44) <sup>*</sup><br>[2.2%]    |
| GLI, Composite               | -0.32 (-0.43, -0.20) <sup>*†</sup><br>[5.8%] | -0.25 (-0.42, -0.09) <sup>*†</sup><br>[5.8%]               | -0.38 (-0.54, -0.22)<br>[5.8%]              |
| <b>zFVC</b>                  |                                              |                                                            |                                             |
| NHANES III, White            | -0.85 (-0.97, -0.74)<br>[19.3%]              | -0.79 (-0.94, -0.63)<br>[14.5%]                            | -0.92 (-1.09, -0.75)<br>[24.1%]             |
| NHANES III, African American | 0.34 (0.23, 0.45) <sup>*†</sup><br>[1.8%]    | 0.41 (0.26, 0.56)<br>[0.7%]                                | 0.27 (0.10, 0.43) <sup>*†</sup><br>[2.9%]   |
| NHANES III, Mexican American | -1.00 (-1.11, -0.88)<br>[24.0%]              | -0.93 (-1.09, -0.77)<br>[21.0%]                            | -1.06 (-1.23, -0.90)<br>[27.0%]             |
| GLI, White                   | -0.79 (-0.91, -0.68)<br>[17.8%]              | -0.74 (-0.89, -0.58)<br>[14.5%]                            | -0.85 (-1.01, -0.69)<br>[21.2%]             |
| GLI, African American        | 0.49 (0.37, 0.61)<br>[2.2%]                  | 0.56 (0.39, 0.72)<br>[1.4%]                                | 0.43 (0.26, 0.60)<br>[2.9%]                 |
| GLI, Composite               | -0.14 (-0.27, -0.02) <sup>*†</sup><br>[6.2%] | -0.08 (-0.25, 0.10) <sup>*†</sup><br>[5.8%]                | -0.21 (-0.39, -0.02) <sup>*</sup><br>[6.6%] |

*Definition of abbreviations:* NHANES III = Third National Health and Nutrition Examination Survey; GLI = Global Lung Function Initiative; zFEV<sub>1</sub> = z-score for FEV<sub>1</sub>; zFVC = z-score for FVC.

Results are presented as mean (95% confidence interval) [percent below the fifth percentile].

<sup>\*</sup>Equation provides sufficient fit: mean z-score < |0.5| (*P* < 0.05) with 95% confidence intervals inside interval [-0.5, 0.5]).<sup>21,34,35</sup>

<sup>†</sup>Equation appropriate for population/subpopulation (provides sufficient fit for both FEV<sub>1</sub> and FVC).

# RACIAL/ETHNIC-BASED SPIROMETRY: ACCURACY FOR ADMIXED

**Table 2b.** Fit of Spirometry Equation Predictions to Spirometric Measurements in Puerto Rican Children: 2006-2014

|                              | All<br>(N = 324)                              | African Ancestry                             |                                             |
|------------------------------|-----------------------------------------------|----------------------------------------------|---------------------------------------------|
|                              |                                               | ≤ Median<br>6.4 to 21.3%<br>(N = 162)        | > Median<br>21.4 to 87.5%<br>(N = 162)      |
| zFEV <sub>1</sub>            |                                               |                                              |                                             |
| NHANES III, White            | -0.16 (-0.28, -0.04) <sup>*</sup><br>[7.1%]   | -0.05 (-0.21, 0.12) <sup>*†</sup><br>[4.9%]  | -0.27 (-0.46, -0.09) <sup>*</sup><br>[9.3%] |
| NHANES III, African American | 0.90 (0.78, 1.02)<br>[0.3%]                   | 1.02 (0.86, 1.18)<br>[0.0%]                  | 0.78 (0.60, 0.96)<br>[0.6%]                 |
| NHANES III, Mexican American | -0.41 (-0.53, -0.28)<br>[11.7%]               | -0.28 (-0.45, -0.12) <sup>*</sup><br>[9.3%]  | -0.53 (-0.72, -0.35)<br>[14.2%]             |
| GLI, White                   | -0.06 (-0.19, 0.06) <sup>*†</sup><br>[6.8%]   | 0.06 (-0.11, 0.22) <sup>*†</sup><br>[4.3%]   | -0.18 (-0.36, 0.01) <sup>*</sup><br>[9.3%]  |
| GLI, African American        | 1.23 (1.10, 1.36)<br>[0.3%]                   | 1.35 (1.18, 1.53)<br>[0.0%]                  | 1.10 (0.91, 1.30)<br>[0.6%]                 |
| GLI, Composite               | 0.56 (0.43, 0.69)<br>[1.5%]                   | 0.69 (0.51, 0.86)<br>[0.6%]                  | 0.43 (0.24, 0.63)<br>[2.5%]                 |
| zFVC                         |                                               |                                              |                                             |
| NHANES III, White            | -0.41 (-0.53, -0.30)<br>[12.0%]               | -0.28 (-0.43, -0.12) <sup>*†</sup><br>[7.4%] | -0.55 (-0.73, -0.37)<br>[16.7%]             |
| NHANES III, African American | 0.76 (0.64, 0.87)<br>[0.6%]                   | 0.89 (0.74, 1.05)<br>[0.0%]                  | 0.62 (0.44, 0.80)<br>[1.2%]                 |
| NHANES III, Mexican American | -0.56 (-0.68, -0.44)<br>[15.7%]               | -0.42 (-0.58, -0.27)<br>[10.5%]              | -0.70 (-0.88, -0.52)<br>[21.0%]             |
| GLI, White                   | -0.33 (-0.46, -0.21) <sup>*†</sup><br>[11.1%] | -0.19 (-0.35, -0.03) <sup>*†</sup><br>[6.8%] | -0.48 (-0.66, -0.29)<br>[15.4%]             |
| GLI, African American        | 1.00 (0.87, 1.13)<br>[0.6%]                   | 1.15 (0.98, 1.32)<br>[0.0%]                  | 0.86 (0.66, 1.06)<br>[1.2%]                 |
| GLI, Composite               | 0.39 (0.25, 0.53)<br>[4.3%]                   | 0.55 (0.37, 0.73)<br>[1.9%]                  | 0.23 (0.02, 0.44) <sup>*</sup><br>[6.8%]    |

*Definition of abbreviations:* NHANES III = Third National Health and Nutrition Examination Survey; GLI = Global Lung Function Initiative; zFEV<sub>1</sub> = z-score for FEV<sub>1</sub>; zFVC = z-score for FVC.

Results are presented as mean (95% confidence interval) [percent below the fifth percentile].

<sup>\*</sup>Equation provides sufficient fit: mean z-score < |0.5| (*P* < 0.05) with 95% confidence intervals inside interval [-0.5, 0.5]).<sup>21,34,35</sup>

<sup>†</sup>Equation appropriate for population/subpopulation (provides sufficient fit for both FEV<sub>1</sub> and FVC).



# RACIAL/ETHNIC-BASED SPIROMETRY: ACCURACY FOR ADMIXED

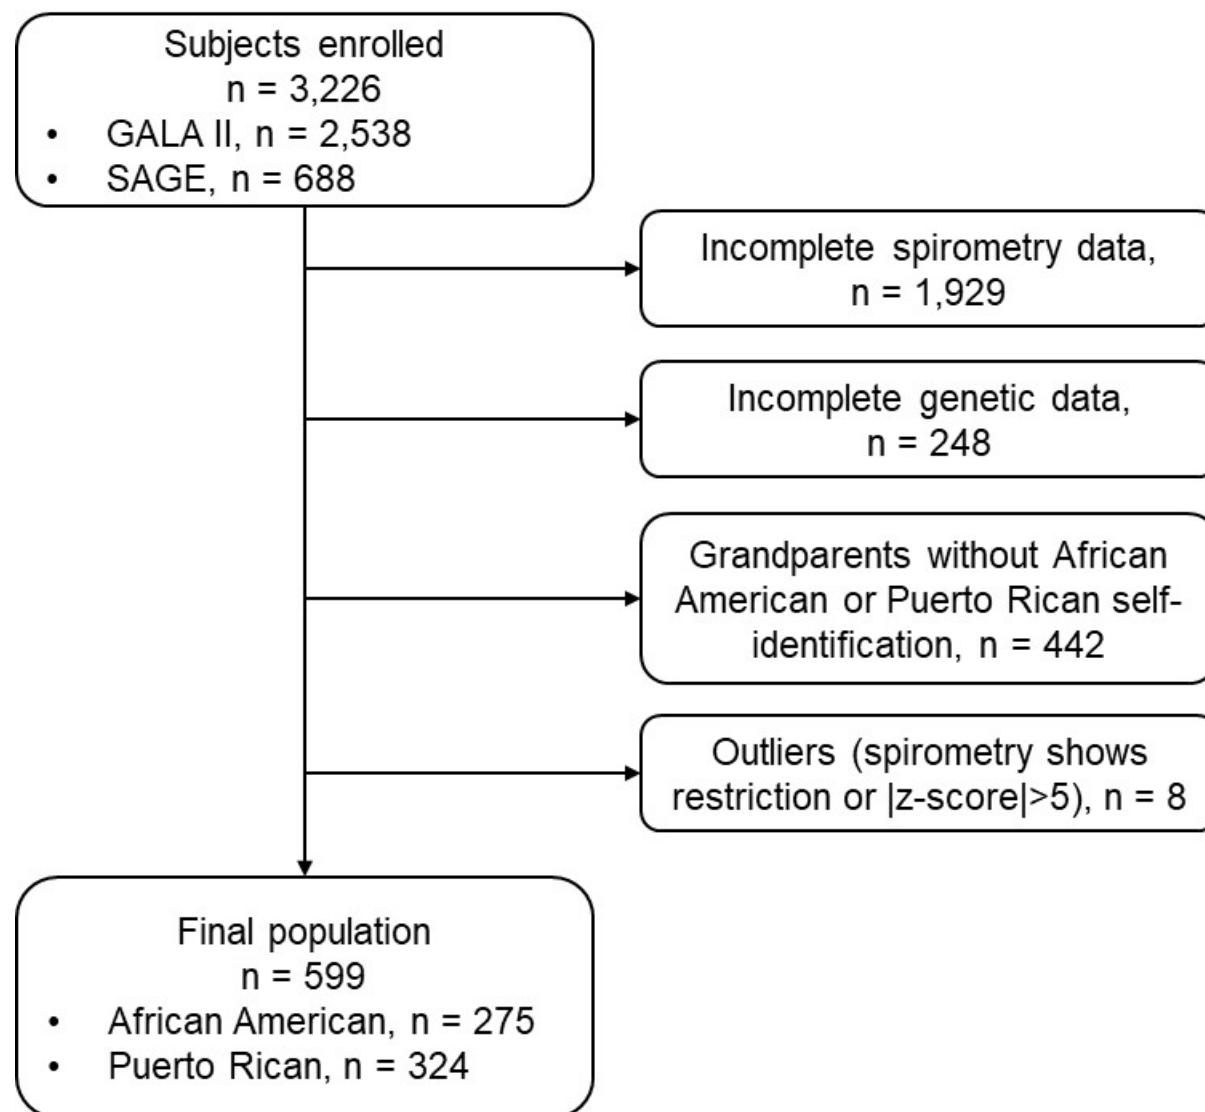

**Figure 1.** Study population. African American and Puerto Rican children (8-21 years old) recruited as part of parallel case-control studies of asthma from the Genes-environments & Admixture in Latino Americans (GALA II) study and the Study of African Americans, Asthma, Genes, & Environments (SAGE).



# RACIAL/ETHNIC-BASED SPIROMETRY: ACCURACY FOR ADMIXED

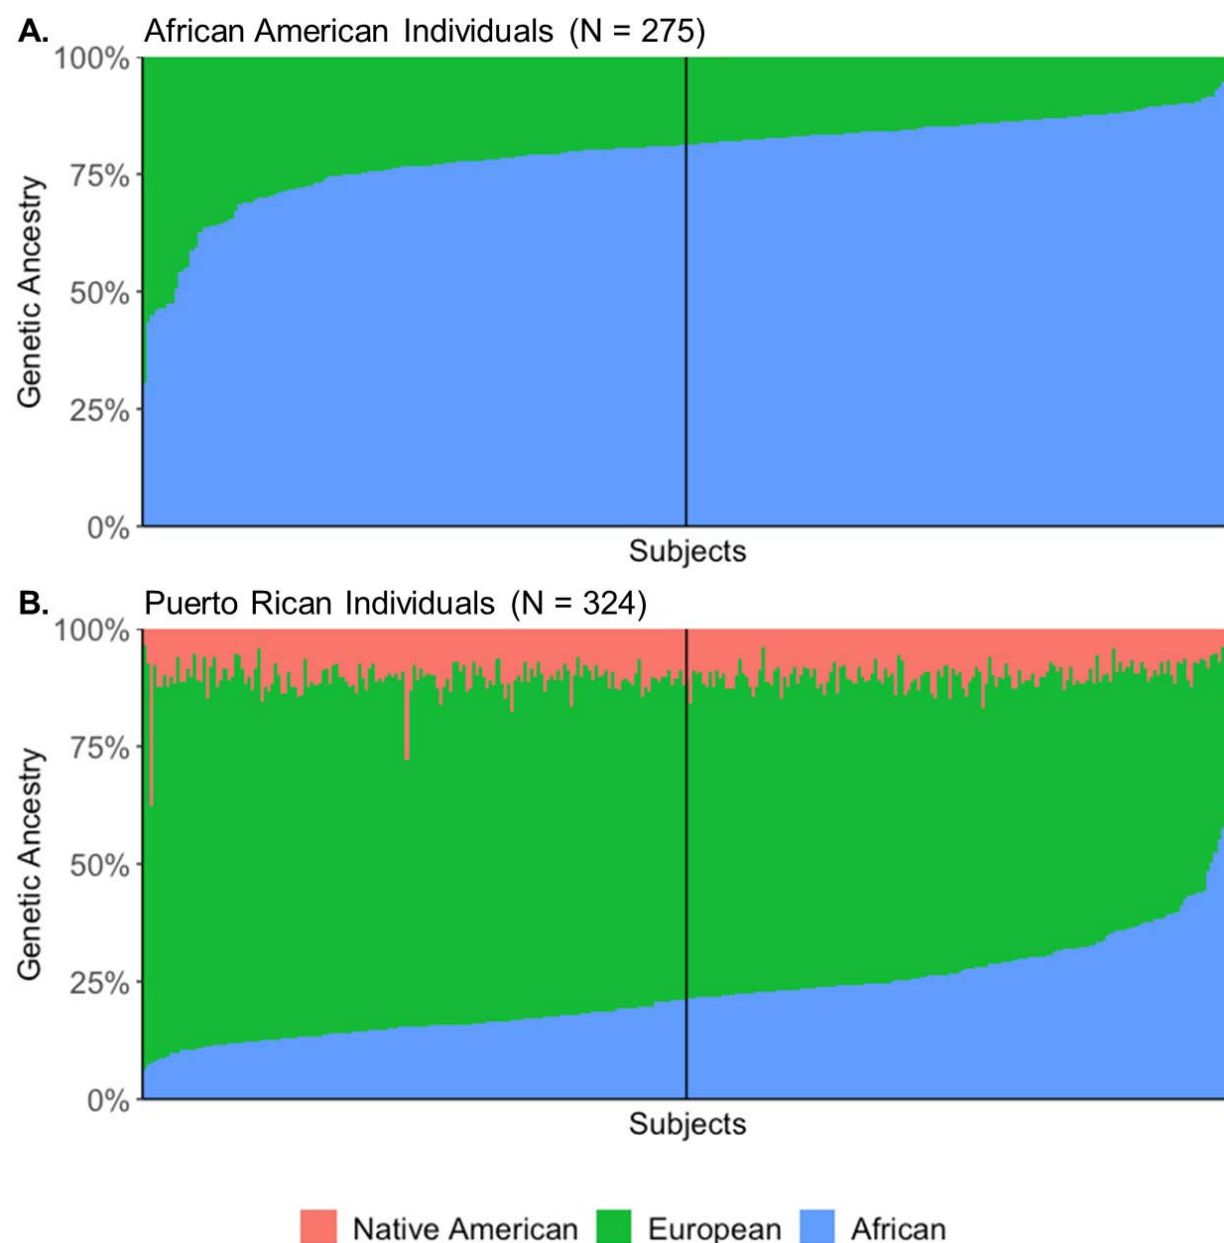

**Figure 2.** Genetic admixture in the (A) African American and (B) Puerto Rican children. The vertical black lines partition each population into paired subpopulations based on proportions of genetic ancestry. The African American and Puerto Rican subpopulations include individuals with African ancestry above and below the median.

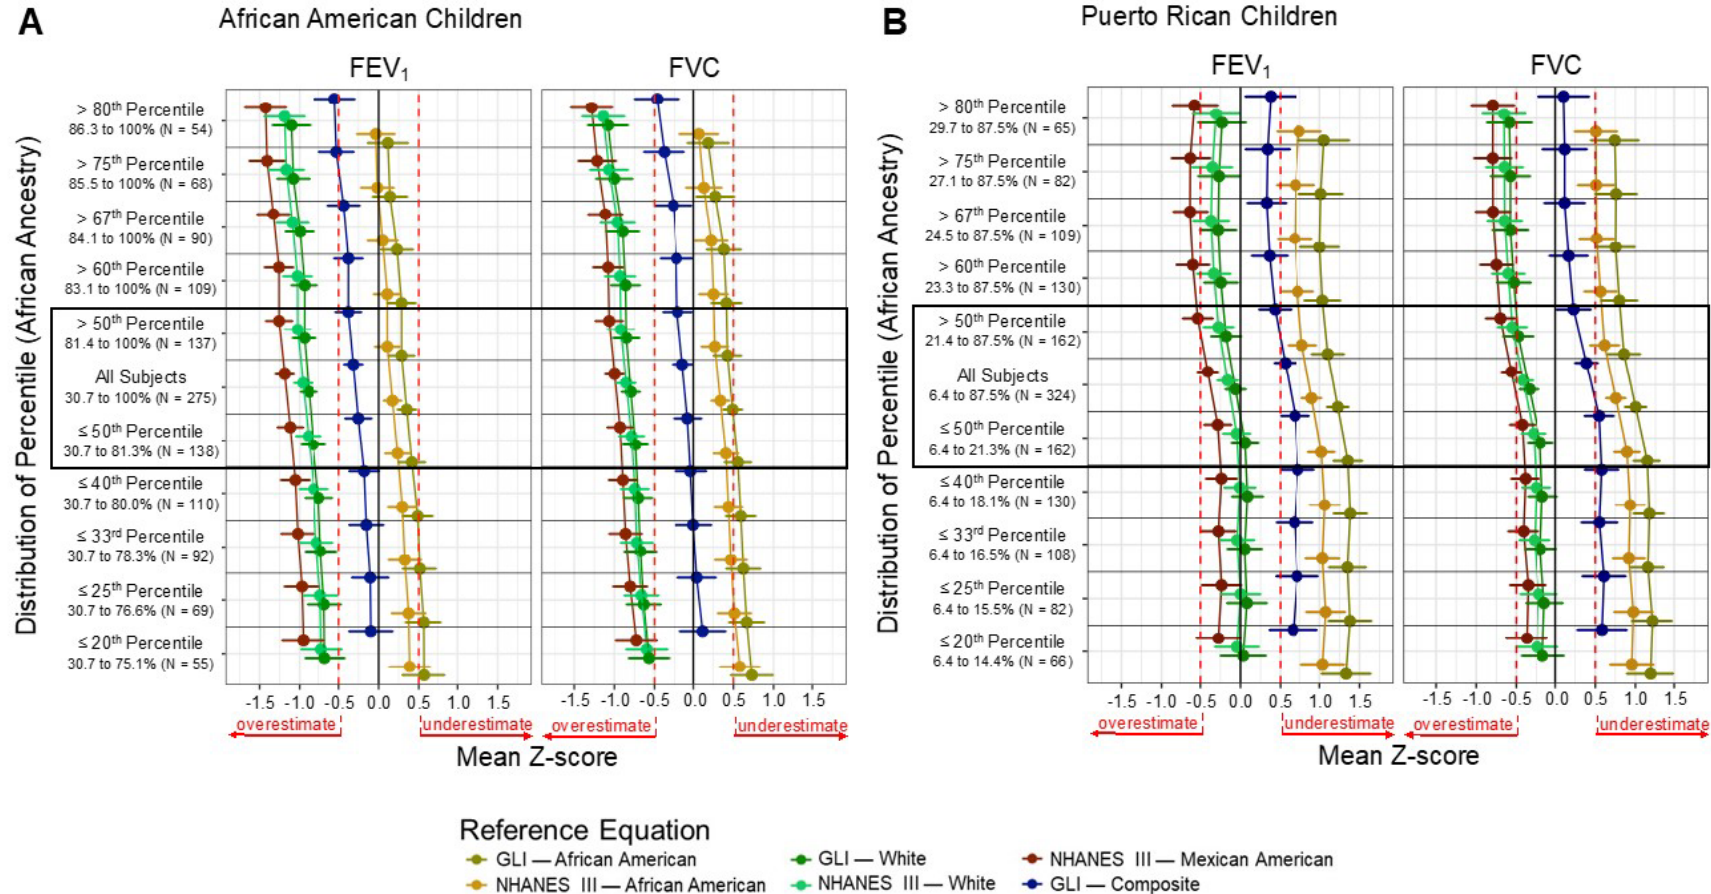

**Figure 3.** Spirometry reference equation fit for predicting FEV<sub>1</sub> and FVC in (A) African American and (B) Puerto Rican children with sensitivity analysis showing equation fit in subpopulations with increasingly disparate proportions of genetic ancestry, including ancestry tertiles, quartiles, and quintiles. Dot-and-whisker plots show mean z-score with 95% confidence intervals for each population/subpopulation. *Solid black vertical lines* indicate mean z-score of zero (perfect equation fit). *Dashed red vertical lines* indicate the interval [-0.5, 0.5] for sufficient equation fit. *Black boxes* outline the primary analysis of the study with sensitivity analysis above and below.
